# Supplementary material for: Synergistic gene expression during the acute phase response is characterized by transcription factor assisted loading
Source: PubMed Central journal article supplement (PMC5707366; doi:10.1038/s41467-017-02055-5), 2017-11-29
Supplement: 41467_2017_2055_MOESM2_ESM.pdf [file 41467_2017_2055_MOESM2_ESM.pdf]

## **Description of Additional Supplementary Files**

File Name: Supplementary Data 1

Description: All cytokine-regulated genes, k-means clustered (k = 4).

File Name: Supplementary Data 2

Description: All cytokine-induced genes, by groups (related to Fig. 1d).

File Name: Supplementary Data 3

Description: STAT3 binding sites called in each condition.

File Name: Supplementary Data 4

Description: Differentially regulated H3K27ac and STAT3 sites.

File Name: Supplementary Data 5

Description: List of the nearest gene to every assisted site.

File Name: Supplementary Data 6

Description: Details of all RNA-seq and ChIP-seq samples.
